# Supplementary material for: Scalemic myrionsumamide A, tetracyclic skeleton alkaloids from Myrioneuron effusum
Source: Royal Society of Chemistry journal article supplement (doi:10.1039/d2ra05342j), 2022-01-01
Supplement: d2ra05342j1.pdf [file d2ra05342j1.pdf]

## Supporting Information

### **Scalemic** Myrionsumamide A, Tetracyclic Skeleton

#### Alkaloids from *Myrioneuron effusum*

Jia-Hui Zhang,<sup>a,c,†</sup> Mingming Cao,<sup>a,†</sup> Yu Zhang,<sup>a</sup> Xiao-Hui Li,<sup>a,d</sup> Yu-Cheng Gu,<sup>e</sup> Xiao-Nian Li,<sup>a</sup> Ying-Tong Di,<sup>a,\*</sup> and Xiao-Jiang Hao<sup>a,b,c,\*</sup>

---

<sup>a.</sup> *State Key Laboratory of Phytochemistry and Plant Resources in West China, Kunming Institute of Botany, Chinese Academy of Sciences, Kunming 650201, China.*

<sup>b.</sup> *The Key Laboratory of Chemistry for Natural Products of Guizhou Province and Chinese Academy of Sciences, Guiyang 550014, China.*

<sup>c.</sup> *Research Unit of Chemical Biology of Natural Anti-Virus Products, Chinese Academy of Medical Sciences, Beijing, 100730, China.*

<sup>d.</sup> *Yunnan Institute of Materia Medica, Kunming 650111, China*

<sup>e.</sup> *Jealott's Hill International Research Centre, Syngenta, Bracknell, Berkshire RG42 6EY, United Kingdom.*

† These authors contribute equally to this work.

\* To whom correspondence should be addressed. Tel: +86-871-65223263. Fax: +86-871-65223070.

E-mail: haoxj@mail.kib.ac.cn; diyt@mail.kib.ac.cn

## Index

|                                                                                                                                       |    |
|---------------------------------------------------------------------------------------------------------------------------------------|----|
| S1.1 <sup>1</sup> H NMR spectrum of Myrionsumamide A ( <b>1</b> ) in CDCl <sub>3</sub> - <i>d</i> <sub>1</sub> .....                  | 3  |
| S1.2 <sup>13</sup> C NMR spectrum of Myrionsumamide A ( <b>1</b> ) in CDCl <sub>3</sub> - <i>d</i> <sub>1</sub> .....                 | 4  |
| S1.3 HSQC spectrum of Myrionsumamide A ( <b>1</b> ) in CDCl <sub>3</sub> - <i>d</i> <sub>1</sub> .....                                | 5  |
| S1.4 <sup>1</sup> H- <sup>1</sup> H COSY spectrum of Myrionsumamide A ( <b>1</b> ) in CDCl <sub>3</sub> - <i>d</i> <sub>1</sub> ..... | 6  |
| S1.5 HMBC spectrum of Myrionsumamide A ( <b>1</b> ) in CDCl <sub>3</sub> - <i>d</i> <sub>1</sub> .....                                | 7  |
| S1.6 ROESY spectrum of Myrionsumamide A ( <b>1</b> ) in CDCl <sub>3</sub> - <i>d</i> <sub>1</sub> .....                               | 8  |
| S1.7 HRESIMS spectrums of Myrionsumamide A ( <b>1</b> ) .....                                                                         | 9  |
| S1.8 UV spectrum of Myrionsumamide A ( <b>1</b> ) in Methanol .....                                                                   | 10 |
| S1.9 IR spectrum of Myrionsumamide A ( <b>1</b> ) .....                                                                               | 11 |
| S1.10 Optical rotation spectrum of (±)-Myrionsumamide A ( <b>1</b> ) .....                                                            | 12 |
| S1.11 Optical rotation spectrum of (+)-Myrionsumamide A ( <b>1</b> ) .....                                                            | 12 |
| S1.12 Optical rotation spectrum of (-)-Myrionsumamide A ( <b>1</b> ) .....                                                            | 12 |
| S1.13 CD spectrum of (±)-Myrionsumamide A ( <b>1</b> ) .....                                                                          | 13 |
| S1.14 CD spectrum of (+)-Myrionsumamide A ( <b>1</b> ) .....                                                                          | 15 |
| S1.15 CD spectrum of (-)-Myrionsumamide A ( <b>1</b> ) .....                                                                          | 17 |

### S1.1 <sup>1</sup>H NMR spectrum of Myrionsumamide A (1) in CDCl<sub>3</sub>-d<sub>1</sub>

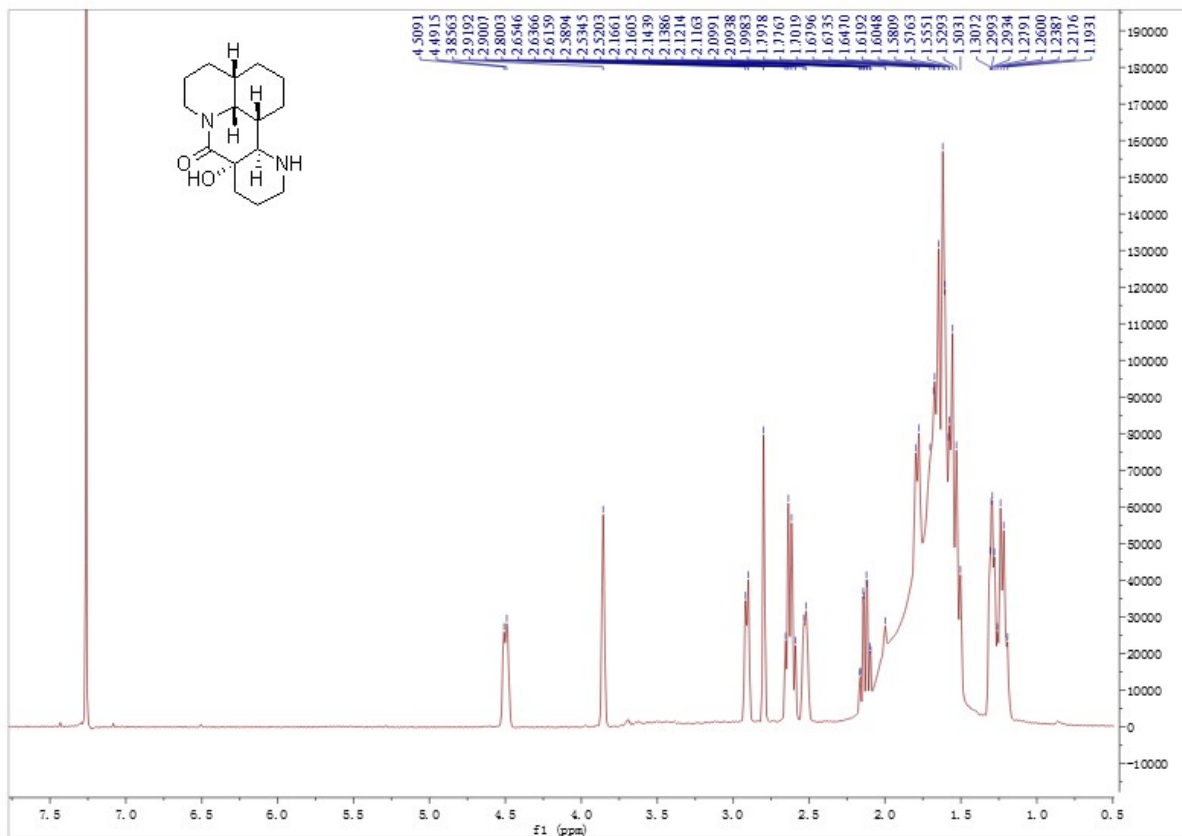

S1.2  $^{13}\text{C}$  NMR spectrum of Myrionsumamide A (1) in  $\text{CDCl}_3-d_1$

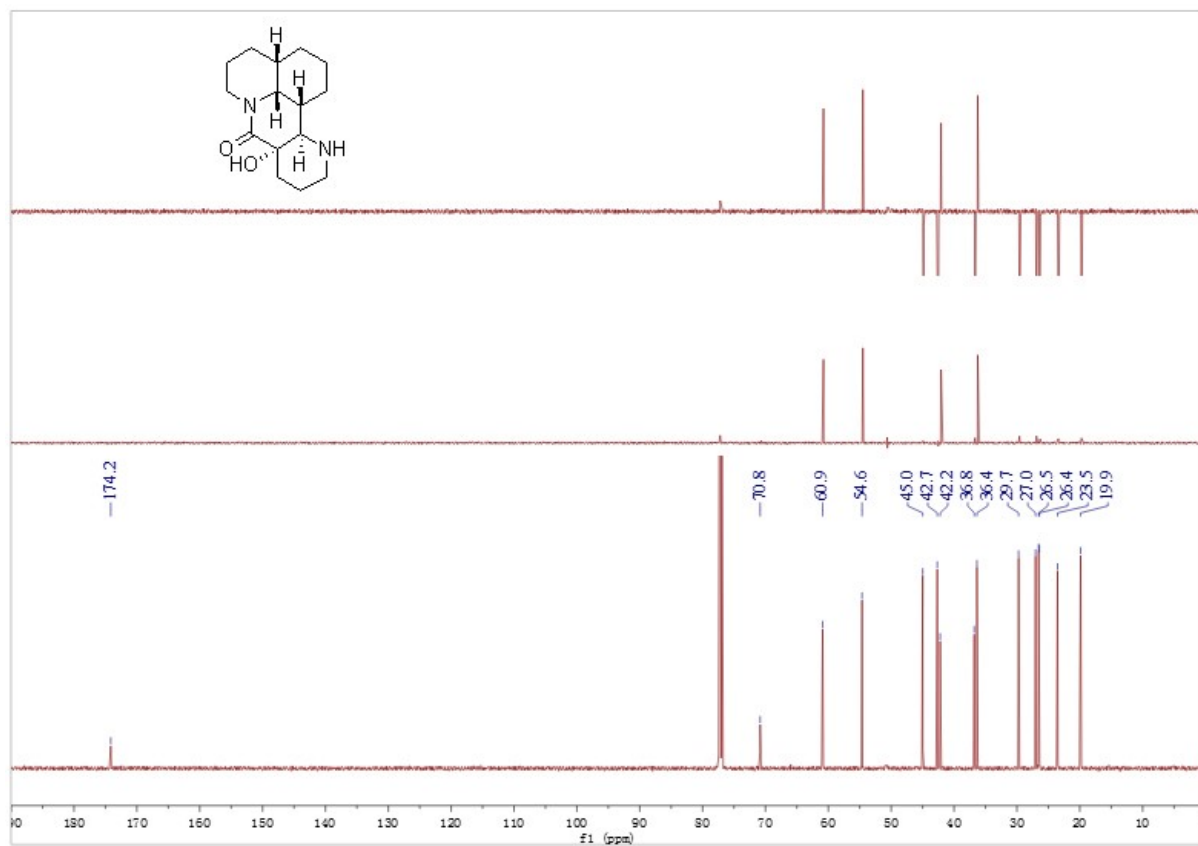

### S1.3 HSQC spectrum of Myrionsumamide A (1) in CDCl<sub>3</sub>-d<sub>1</sub>

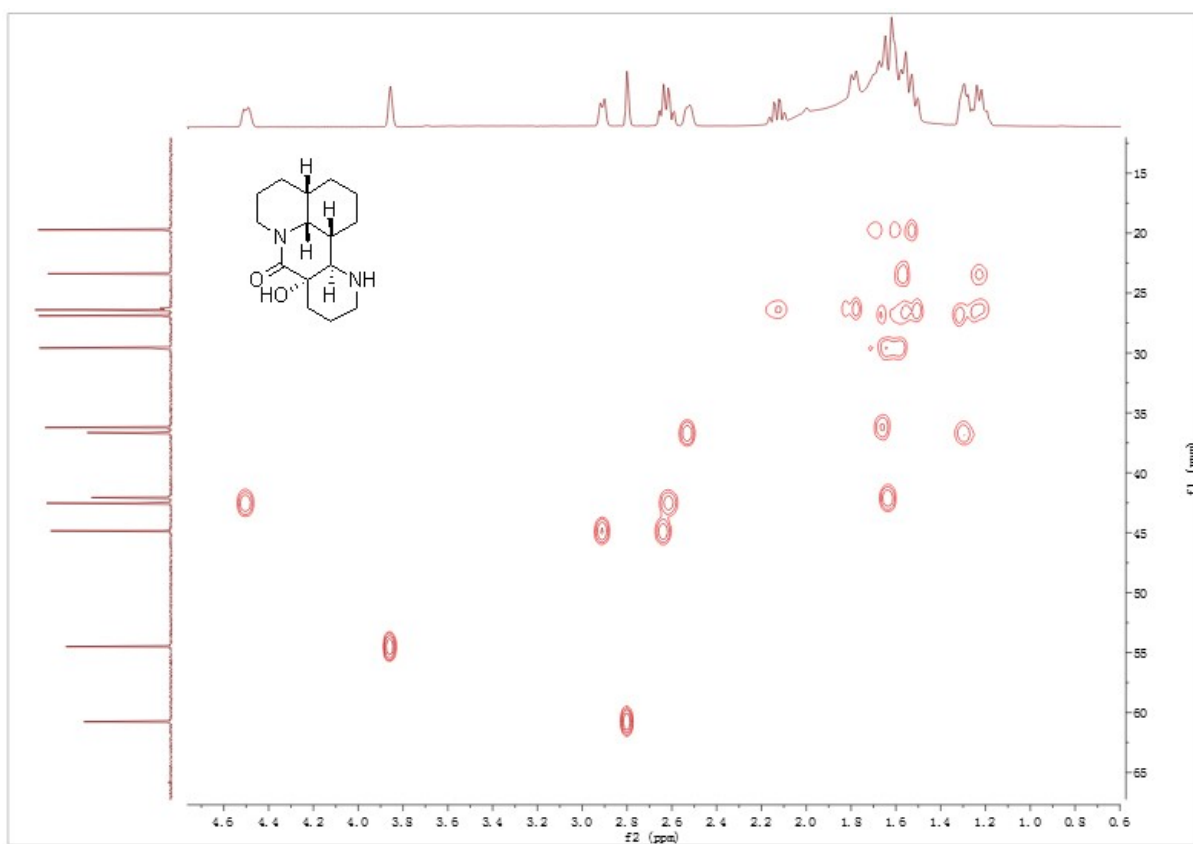

S1.4  $^1\text{H}$ - $^1\text{H}$ COSY spectrum of Myrionsumamide A (1) in  $\text{CDCl}_3-d_1$

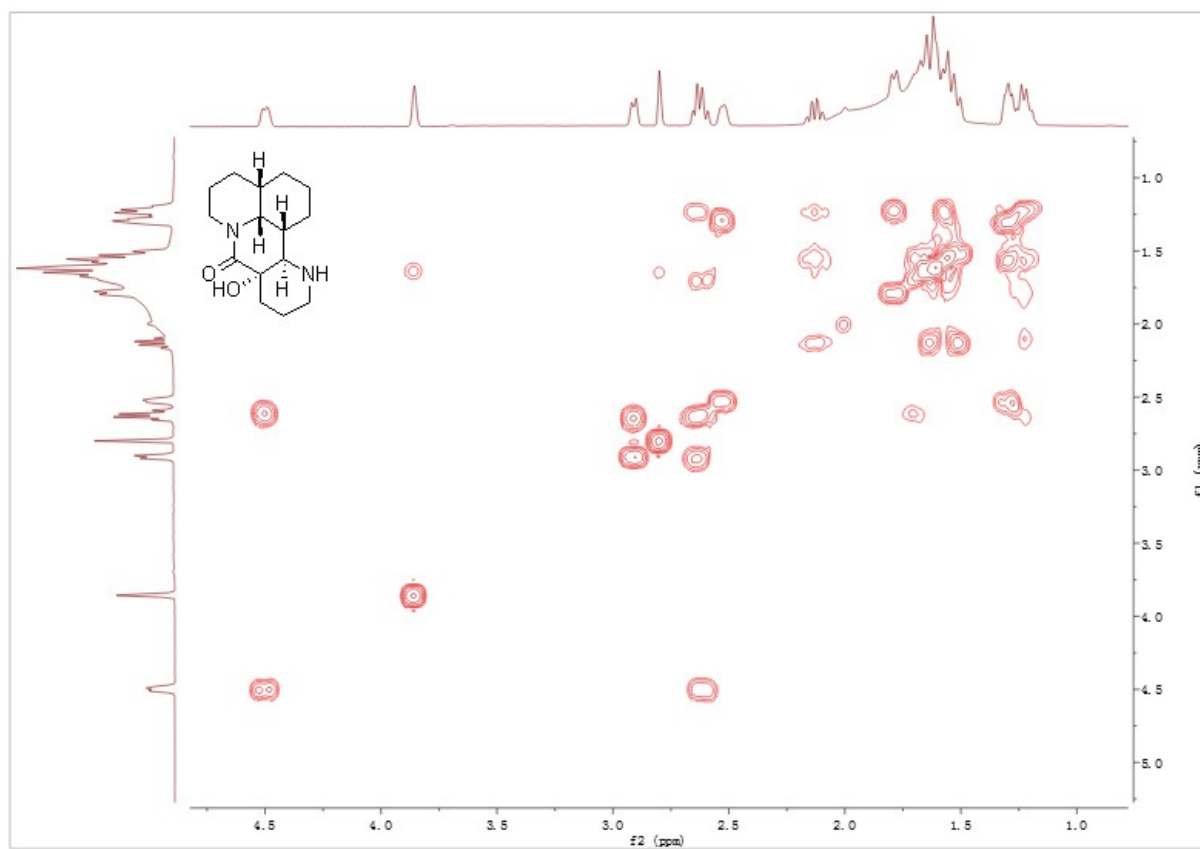

S1.5 HMBC spectrum of Myrionsumamide A (1) in  $\text{CDCl}_3-d_1$

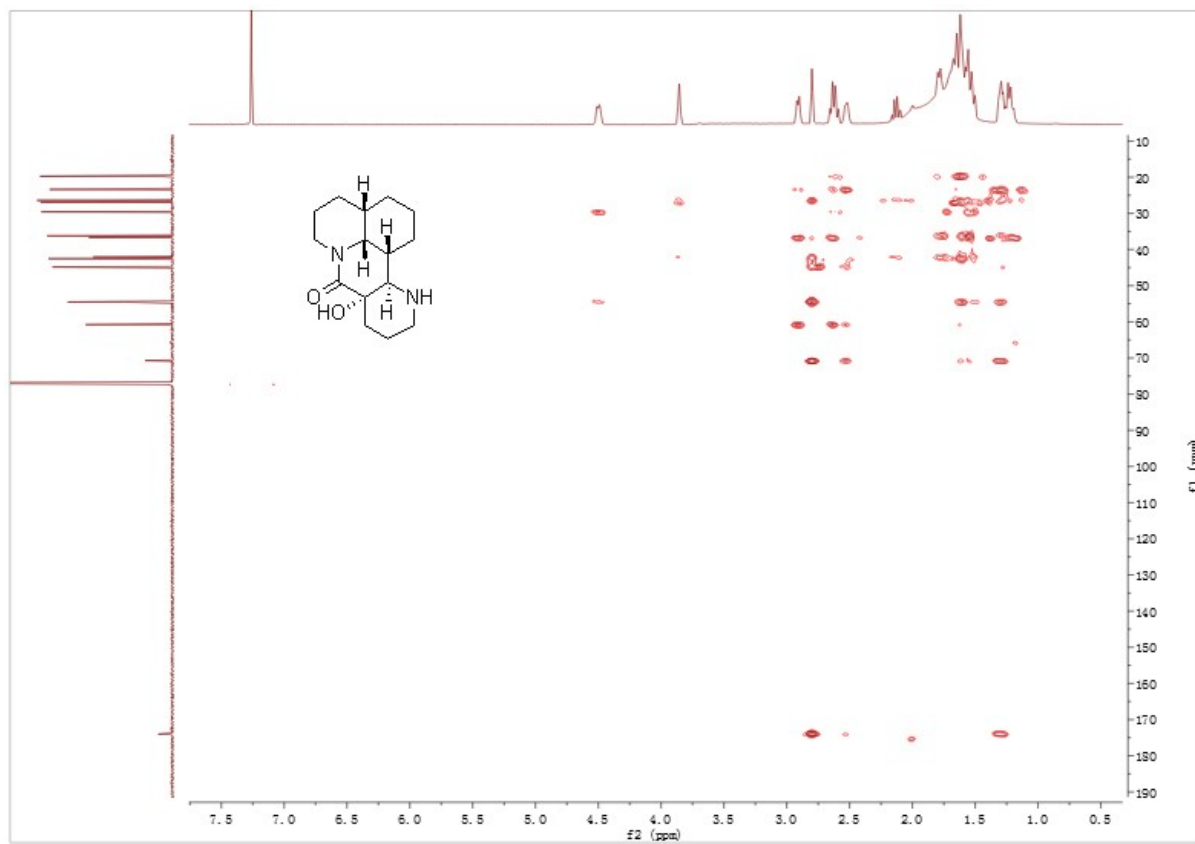

**S1.6 ROESY spectrum of Myrionsumamide A (1) in CDCl<sub>3</sub>-d<sub>1</sub>**

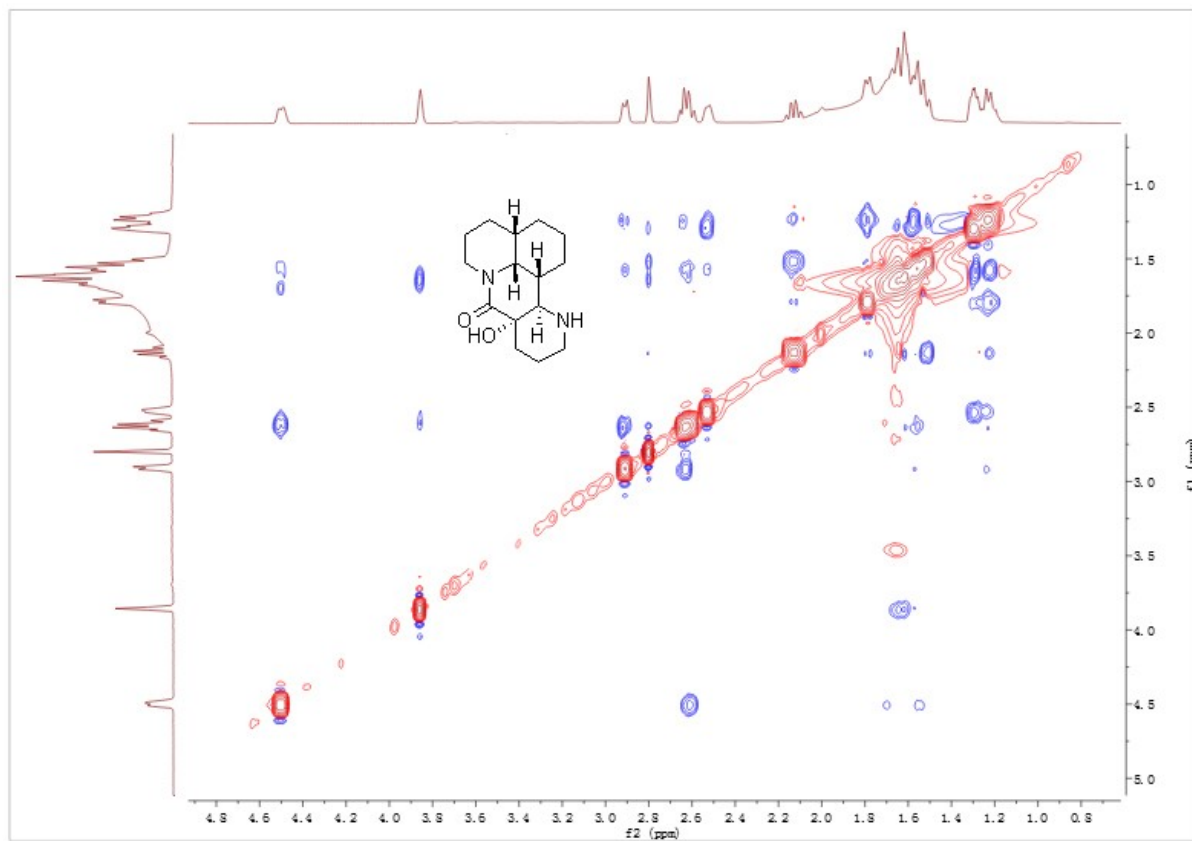



# S1.7 HRESIMS spectrums of Myrionsumamide A (1)

## Qualitative Analysis Report

**Data Filename** hmen50.d **Sample Name** hmen50  
**Sample Type** Sample **Position** P1-C4  
**Instrument Name** Instrument 1 **User Name**  
**Acq Method** SIBU.m **Acquired Time** 12/22/2015 10:42:47 AM  
**IRM Calibration Status** Success **DA Method** ESI+.m  
**Comment**

**Sample Group** **Info.**  
**Acquisition SW** 6200 series TOF/6500 series  
**Version** Q-TOF B.05.01 (B5125.2)

### User Spectra

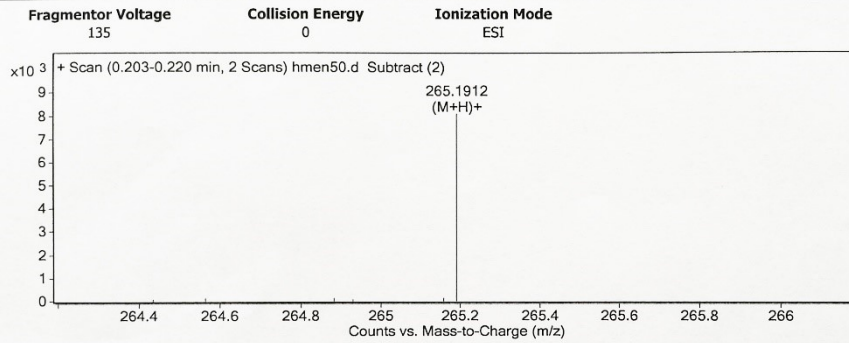

### Peak List

| m/z      | z | Abund   | Formula       | Ion    |
|----------|---|---------|---------------|--------|
| 265.1912 | 1 | 8139    | C15 H24 N2 O2 | (M+H)+ |
| 266.1945 | 1 | 1219.44 | C15 H24 N2 O2 | (M+H)+ |
| 279.2064 |   | 819.27  |               |        |
| 287.1725 |   | 630.36  |               |        |
| 303.1468 |   | 1934.36 |               |        |
| 343.2021 |   | 604.61  |               |        |
| 477.3125 |   | 848.48  |               |        |
| 678.4785 |   | 514.88  |               |        |

### Formula Calculator Element Limits

| Element | Min | Max |
|---------|-----|-----|
| C       | 3   | 60  |
| H       | 0   | 120 |
| O       | 0   | 30  |
| N       | 0   | 10  |

### Formula Calculator Results

| Formula       | CalculatedMass | CalculatedMz | Mz       | Diff. (mDa) | Diff. (ppm) | DBE    |
|---------------|----------------|--------------|----------|-------------|-------------|--------|
| C15 H24 N2 O2 | 264.1838       | 265.1911     | 265.1912 | -0.1        | -0.5        | 5.0000 |

--- End Of Report ---

### S1.8 UV spectrum of Myrionsumamide A (1) in Methanol

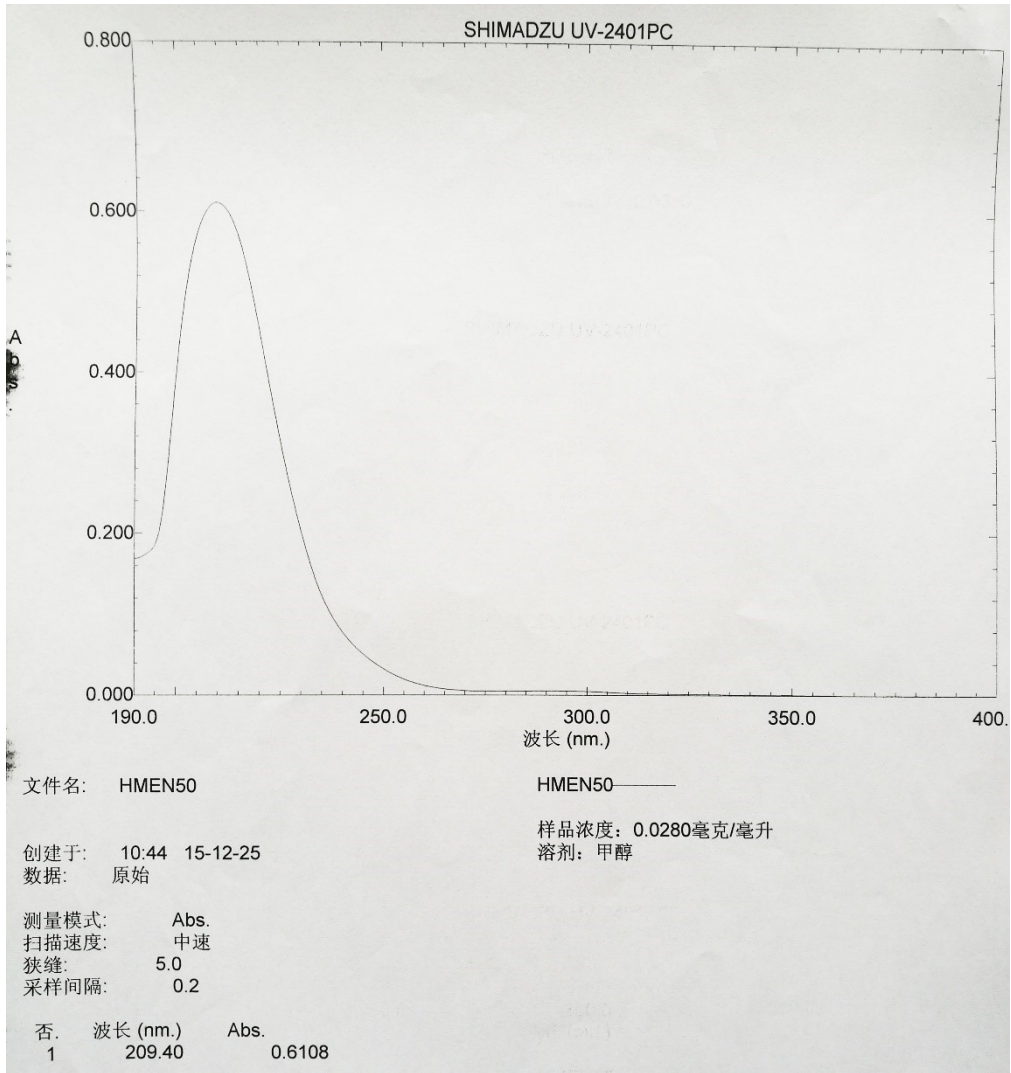

### S1.9 IR spectrum of Myrionsumamide A (1)

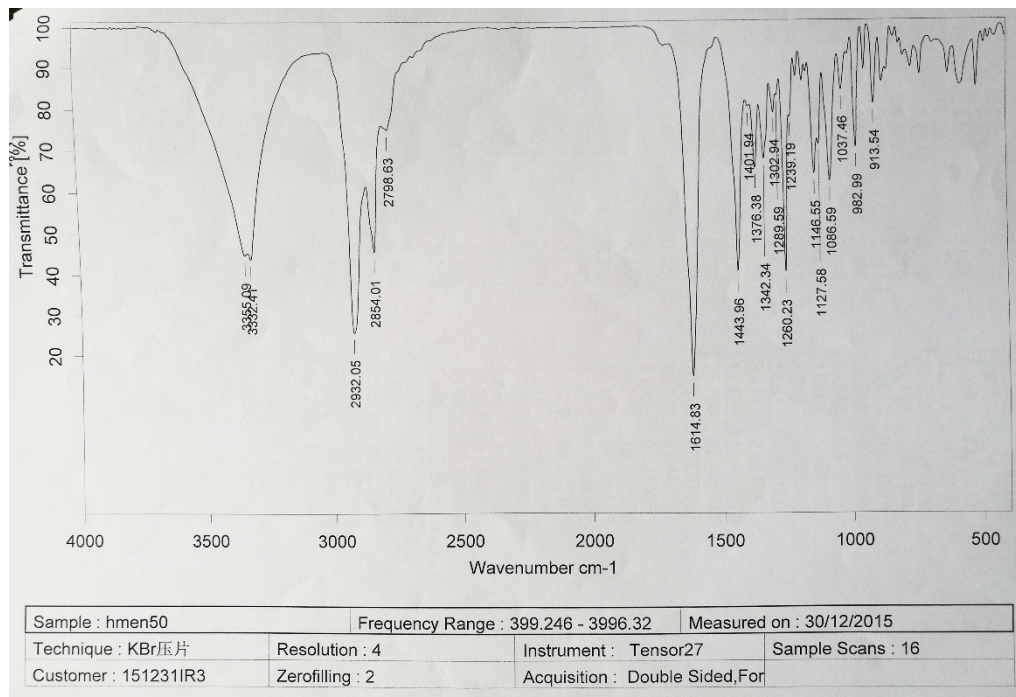

### S1.10 Optical rotation spectrum of (±)-Myrionsumamide A (1)

Optical rotation measurement

Model : P-1020 (A060460638)

| No.  | Sample   | Mode   | Data   | Monitor Blank    | Temp. Cell Temp Point | Date Comment Sample Name                               | Light Filter Operator   | Cycle Time Integ Time |
|------|----------|--------|--------|------------------|-----------------------|--------------------------------------------------------|-------------------------|-----------------------|
| No.1 | 35 (1/3) | Sp.Rot | 9.5000 | 0.0038<br>0.0000 | 19.2<br>10.00<br>Cell | Tue Dec 22 21:35:16 2015<br>0.00400g/mL MeOH<br>HMEN50 | Na<br>589nm<br>Operator | 2 sec<br>10 sec       |
| No.2 | 35 (2/3) | Sp.Rot | 8.7500 | 0.0035<br>0.0000 | 19.2<br>10.00<br>Cell | Tue Dec 22 21:35:30 2015<br>0.00400g/mL MeOH<br>HMEN50 | Na<br>589nm<br>Operator | 2 sec<br>10 sec       |
| No.3 | 35 (3/3) | Sp.Rot | 8.2500 | 0.0033<br>0.0000 | 19.3<br>10.00<br>Cell | Tue Dec 22 21:35:43 2015<br>0.00400g/mL MeOH<br>HMEN50 | Na<br>589nm<br>Operator | 2 sec<br>10 sec       |

*+8.8333°*

### S1.11 Optical rotation spectrum of (+)-Myrionsumamide A (1)

Optical rotation measurement

Model : P-1020 (A060460638)

| No.  | Sample  | Mode   | Data   | Monitor Blank    | Temp. Cell Temp Point | Date Comment Sample Name                                | Light Filter Operator   | Cycle Time Integ Time |
|------|---------|--------|--------|------------------|-----------------------|---------------------------------------------------------|-------------------------|-----------------------|
| No.1 | 6 (1/3) | Sp.Rot | 8.2860 | 0.0058<br>0.0000 | 23.9<br>50.00<br>Cell | Tue Mar 08 18:37:29 2016<br>0.00140g/mL MeOH<br>HMEN50B | Na<br>589nm<br>Operator | 2 sec<br>10 sec       |
| No.2 | 6 (2/3) | Sp.Rot | 5.5710 | 0.0039<br>0.0000 | 23.9<br>50.00<br>Cell | Tue Mar 08 18:37:43 2016<br>0.00140g/mL MeOH<br>HMEN50B | Na<br>589nm<br>Operator | 2 sec<br>10 sec       |
| No.3 | 6 (3/3) | Sp.Rot | 8.4290 | 0.0059<br>0.0000 | 23.9<br>50.00<br>Cell | Tue Mar 08 18:37:56 2016<br>0.00140g/mL MeOH<br>HMEN50B | Na<br>589nm<br>Operator | 2 sec<br>10 sec       |

*+7.4286°*

### S1.12 Optical rotation spectrum of (-)-Myrionsumamide A (1)

Optical rotation measurement

Model : P-1020 (A060460638)

| No.  | Sample   | Mode   | Data     | Monitor Blank     | Temp. Cell Temp Point | Date Comment Sample Name                                | Light Filter Operator   | Cycle Time Integ Time |
|------|----------|--------|----------|-------------------|-----------------------|---------------------------------------------------------|-------------------------|-----------------------|
| No.1 | 12 (1/3) | Sp.Rot | -16.2500 | -0.0026<br>0.0000 | 24.9<br>10.00<br>Cell | Wed Mar 16 19:23:10 2016<br>0.00160g/mL MeOH<br>HMEN50A | Na<br>589nm<br>Operator | 2 sec<br>10 sec       |
| No.2 | 12 (2/3) | Sp.Rot | -19.3750 | -0.0031<br>0.0000 | 24.9<br>10.00<br>Cell | Wed Mar 16 19:23:23 2016<br>0.00160g/mL MeOH<br>HMEN50A | Na<br>589nm<br>Operator | 2 sec<br>10 sec       |
| No.3 | 12 (3/3) | Sp.Rot | -17.5000 | -0.0028<br>0.0000 | 24.9<br>10.00<br>Cell | Wed Mar 16 19:23:37 2016<br>0.00160g/mL MeOH<br>HMEN50A | Na<br>589nm<br>Operator | 2 sec<br>10 sec       |

*-17.1083°*

### S1.13 CD spectrum of (±)-Myrionsumamide A (1)

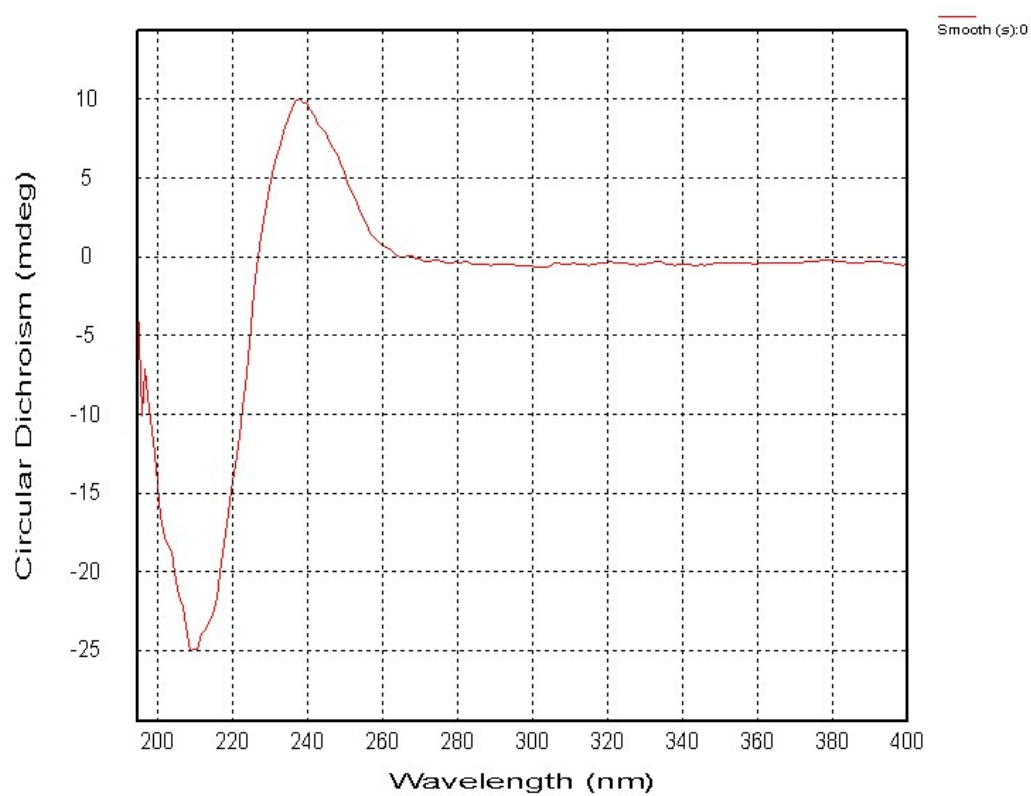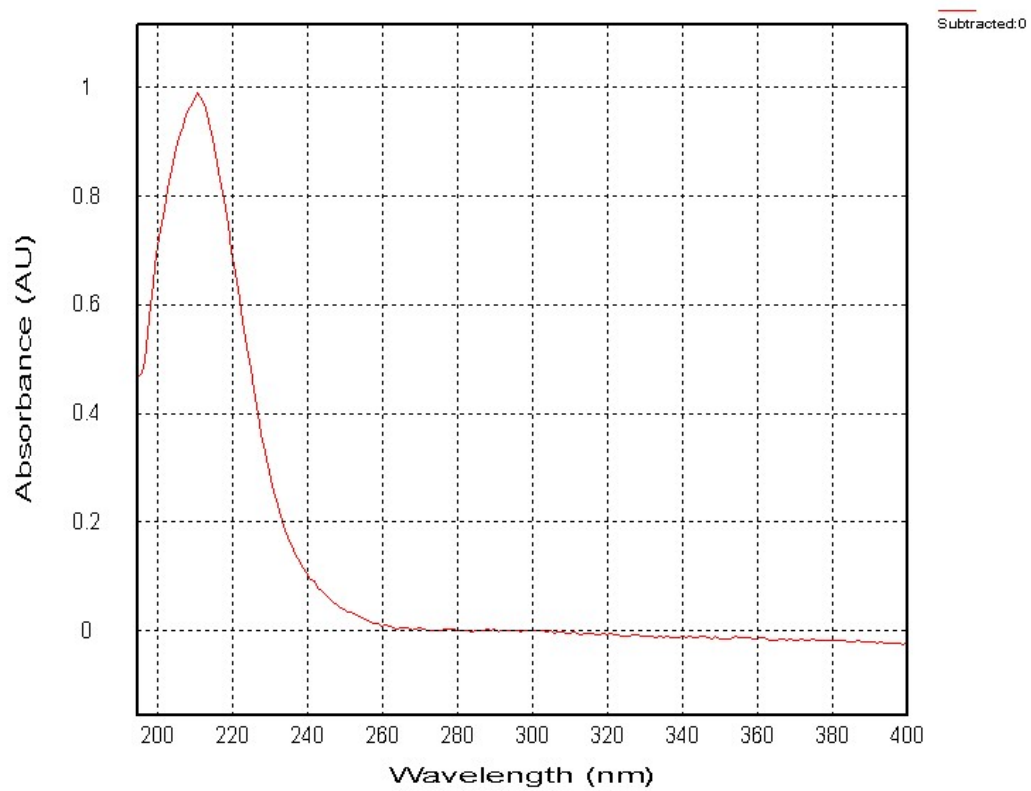

ProBinaryX

Attributes :

- Time Stamp :Wed Dec 23 14:24:44 2015

- File ID : {61AE1CDE-D9D1-4edc-A85B-DA2E8956BA65}

- Is CFR Compliant : false

- Original unaltered data

Remarks:

- HV (CDDC channel): 0 v

- Time per point: 1 s

- Description: Sample 1

- Concentration: 0.3040mg/mL MeOH

- Pathlength: 1 mm

Settings:

- Time-per-point: 1s (25us x 40000)

- Wavelength: 195nm - 400nm

- Step Size: 1nm

- Bandwidth: 1nm

### S1.14 CD spectrum of (+)-Myrionsumamide A (1)

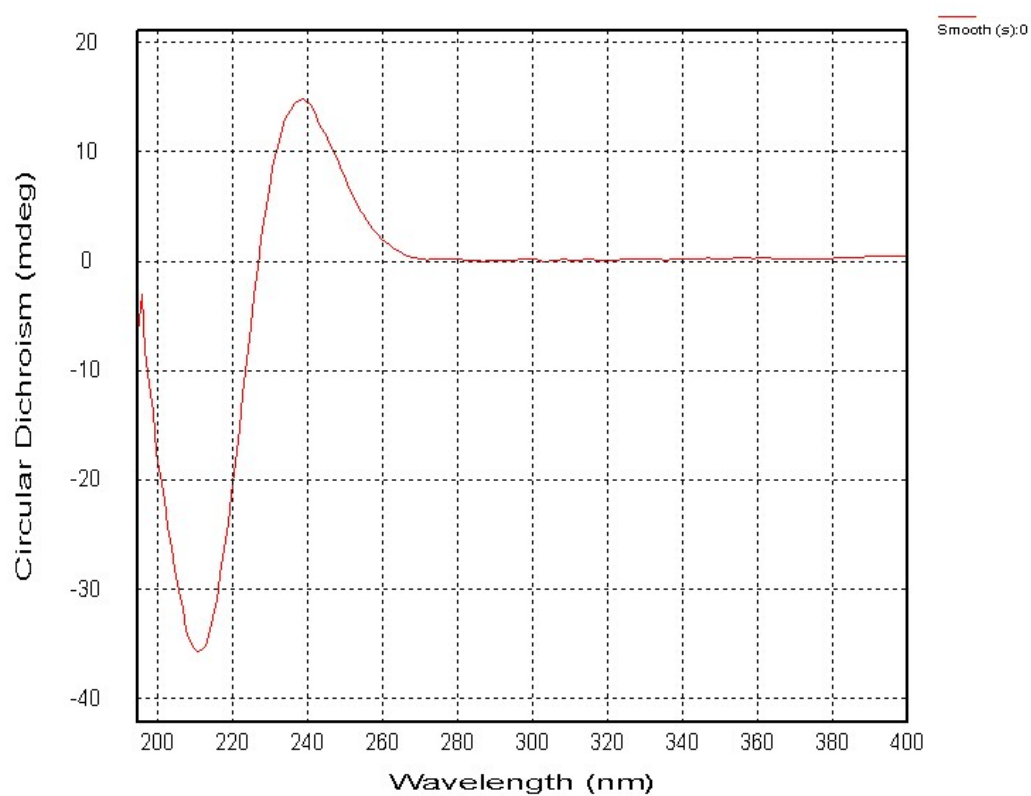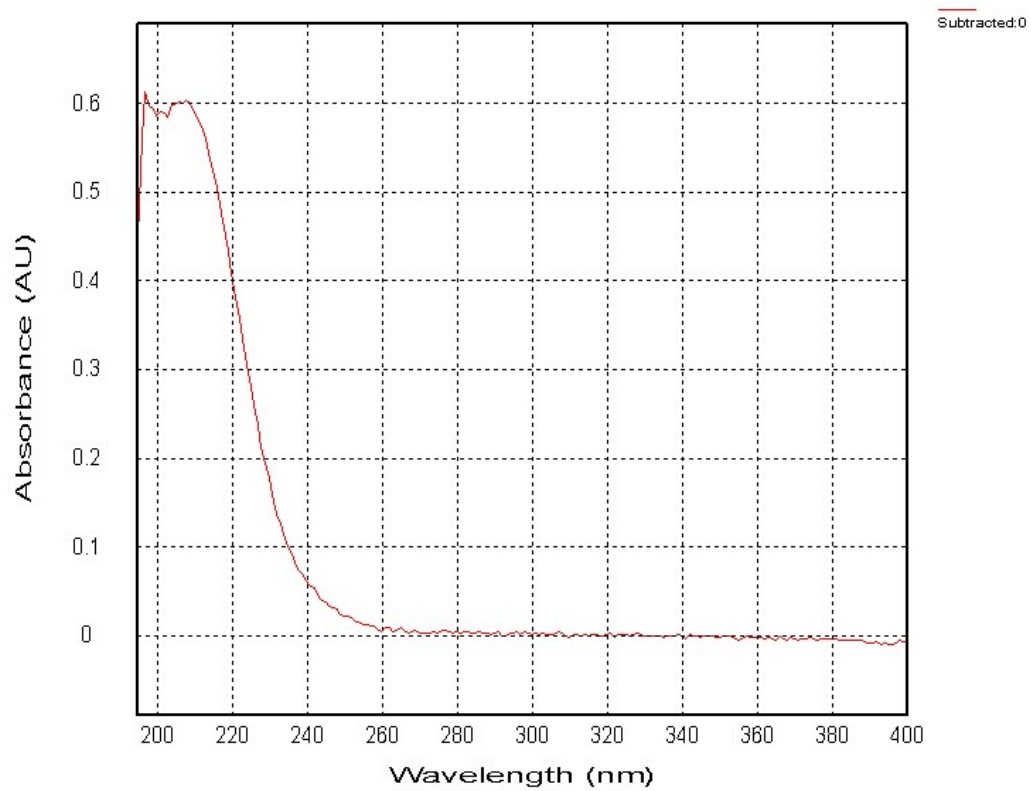

ProBinaryX

Attributes :

- Time Stamp :Thu Mar 10 13:34:43 2016
- File ID : {5197E311-3F0B-42b9-AFF0-820D92AE8091}
- Is CFR Compliant : false
- Original unaltered data

Remarks:

- HV (CDDC channel): 0 v
- Time per point: 1 s
- Description: Sample 1
- Concentration: 0.4200mg/mL MeOH
- Pathlength: 1 mm

Settings:

- Time-per-point: 1s (25us x 40000)
- Wavelength: 195nm - 400nm
- Step Size: 1nm
- Bandwidth: 2nm



### S1.15 CD spectrum of (-)-Myrionsumamide A (1)

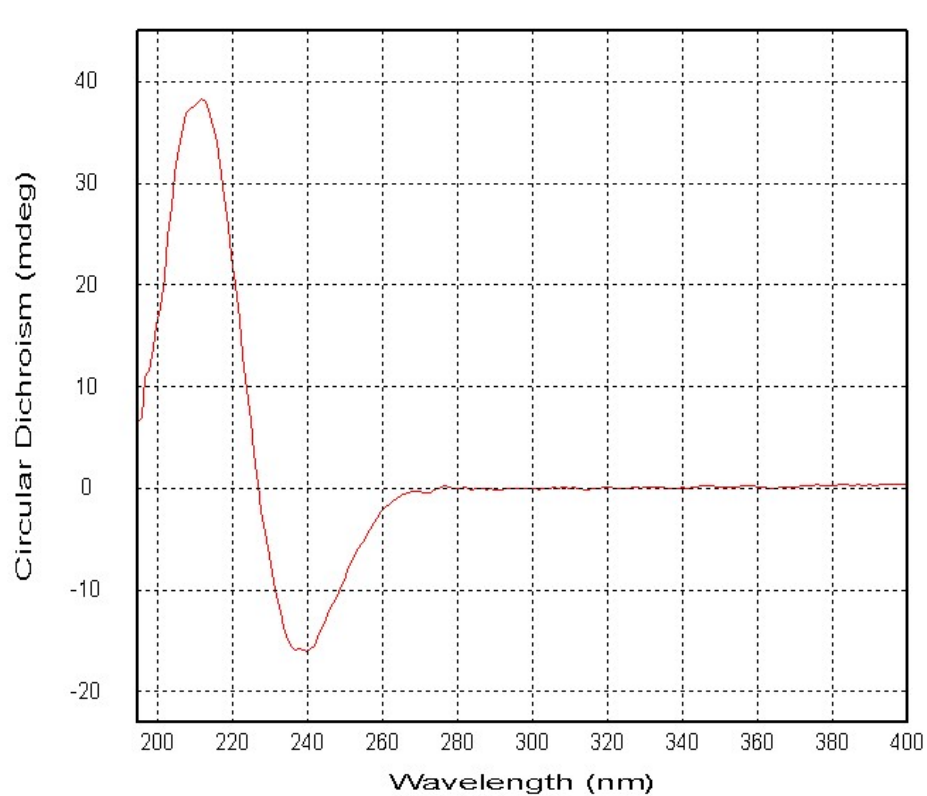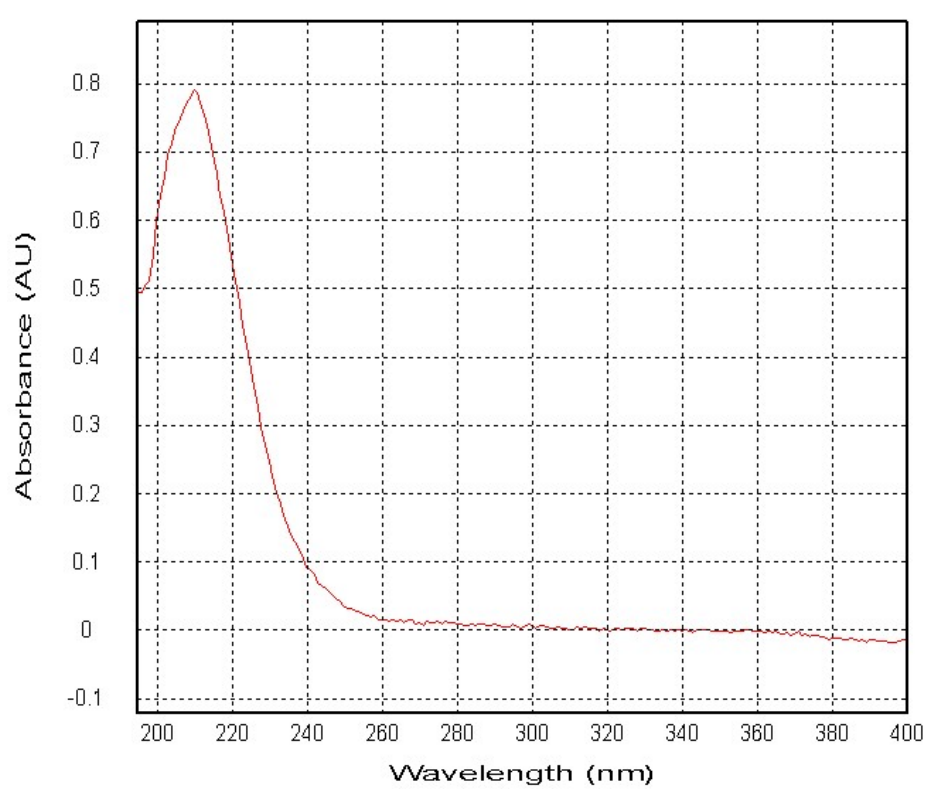

File: CD HMEN50A-1mm(195-400)16031702.dsx

ProBinaryX

Attributes :

- Time Stamp :Thu Mar 17 09:43:46 2016

- File ID : {532A55E5-EEE9-4cf5-85DD-F65A8CA1090F}

- Is CFR Compliant : false

- Original unaltered data

Remarks:

- HV (CDDC channel): 0 v

- Time per point: 1 s

- Description: Sample 1

- Concentration: 0.5120mg/mL MeOH

- Pathlength: 1 mm

Settings:

- Time-per-point: 1s (25us x 40000)

- Wavelength: 195nm - 400nm

- Step Size: 1nm

- Bandwidth: 1nm
